# Supplementary material for: Coping and adjustment in caregivers: A systematic review
Source: PubMed Central journal article supplement — Health Psychol Open. 2018 Nov 9;5(2):2055102918810659. doi: 10.1177/2055102918810659 (PMC6236498; doi:10.1177/2055102918810659), 2018-11-09
Supplement: Table_1-2_Main_characteristics_of_included_studies.pdf [file Table_1-2_Main_characteristics_of_included_studies.pdf]

Table 1

## Main characteristics of quantitative studies

| Study                                     | Quality score (max 11) | Method                                           | Participant characteristics                                    | Theory                                                           | Psychosocial measures | Physiological measures | Findings                                                                                                                                                                                                                                                                                                                                                                                                                                                                                                                                                                                                                                                                                                                                                                                                                                                                                                                                 |
|-------------------------------------------|------------------------|--------------------------------------------------|----------------------------------------------------------------|------------------------------------------------------------------|-----------------------|------------------------|------------------------------------------------------------------------------------------------------------------------------------------------------------------------------------------------------------------------------------------------------------------------------------------------------------------------------------------------------------------------------------------------------------------------------------------------------------------------------------------------------------------------------------------------------------------------------------------------------------------------------------------------------------------------------------------------------------------------------------------------------------------------------------------------------------------------------------------------------------------------------------------------------------------------------------------|
| Bachanas et al (2001)                     | 5                      | Cross-sectional<br>Self-report<br>Between groups | n= 36 CG's, 32 matched control NCG's                           | Transactional Model of Stress & Coping (Lazarus & Folkman, 1984) | ✓                     |                        | Poor CG adjustment related to more daily hassles, use of more palliative coping strategies and fewer family resources<br>CG's who report more daily hassles report more psychological distress<br>CG's using more palliative coping reported more psychological distress than CG's using more adaptive coping                                                                                                                                                                                                                                                                                                                                                                                                                                                                                                                                                                                                                            |
| Barbosa, Figueired, Sousa & Demain (2011) | 7                      | Cross-sectional<br>Self-report<br>Between groups | n= 90 primary CG's, 90 secondary CG's<br>Mean age 45.23 years  | Transactional Model of Stress & Coping (Lazarus & Folkman, 1984) | ✓                     |                        | All strategies involving direct action were used and perceived as helpful by more than 50% of CG's<br>Relying on own expertise and experience was most useful approach for both groups<br>Planning in advance most useful and effective for secondary CG's<br>Primary CG's used firmness, pointing out expectations, preventing problems, getting professional help and altering home environment<br>Believing in oneself and one's ability to handle the situation were most successful emotional-cognitive strategies<br>Increased use of problem solving coping associated with better self-rated physical health<br>Higher use of emotional-cognitive coping and dealing with the consequences of stress were associated with poorer mental health perception<br>Secondary CG's found distraction and avoidance strategies less effective<br>Have a good cry useful for primary CG's and get rid of excess energy for secondary CG's |
| Figueiredo et al (2014)                   | 8                      | Cross-sectional<br>Self-report<br>Between groups | n= 158 family CG's<br>Mean age 58.39 years                     |                                                                  | ✓                     |                        | Effects of stressors mediated by social support, coping and appraisals<br>High levels of avoidance coping and low levels of approach coping were related to increased depression and lower life satisfaction<br>Greater social support and activity related to higher life satisfaction and lower depression                                                                                                                                                                                                                                                                                                                                                                                                                                                                                                                                                                                                                             |
| Haley et al (1996)                        | 6                      | Cross-sectional<br>Self-report<br>Between groups | n= 123 white CG's, 74 black CG's<br>Mean age 62.36/55.45 years | Stress Process Model (Haley, Levine, Brown & Bartolucci, 1987)   | ✓                     |                        | High stress appraisals associated with higher depression<br>Higher initial and increased use of problem focussed (PF) coping in mothers of ID predicted declining levels of burden                                                                                                                                                                                                                                                                                                                                                                                                                                                                                                                                                                                                                                                                                                                                                       |
| Kim, Greenberg, Seltzer &                 | 7                      | Longitudinal<br>Self-report<br>Between groups    | n= 246 mothers of adults with intellectual disability, 74      | Stress and Coping paradigm (Pearlin et al, 1990)                 | ✓                     |                        |                                                                                                                                                                                                                                                                                                                                                                                                                                                                                                                                                                                                                                                                                                                                                                                                                                                                                                                                          |

|                                                         |   |                                                   |                                                                                        |                                                                             |   |                                          |                                                                                                                                                                                                                                                                                                                                                                                                                                                                                                                                                                                                                                                                                                                                                                                                                                                                                    |
|---------------------------------------------------------|---|---------------------------------------------------|----------------------------------------------------------------------------------------|-----------------------------------------------------------------------------|---|------------------------------------------|------------------------------------------------------------------------------------------------------------------------------------------------------------------------------------------------------------------------------------------------------------------------------------------------------------------------------------------------------------------------------------------------------------------------------------------------------------------------------------------------------------------------------------------------------------------------------------------------------------------------------------------------------------------------------------------------------------------------------------------------------------------------------------------------------------------------------------------------------------------------------------|
| Krauss (2003)                                           |   |                                                   | mothers of adults with mental illness<br>Mean age 66 years                             |                                                                             |   |                                          | Increased emotion focussed (EF) coping in mothers of ID increased burden, decreased EF coping decreased burden<br>High use of PF coping and low use of EF coping at wave 1 predicted declining depressive symptoms<br>Increase of EF coping between waves 1 and 2 related to higher burden and depression and poorer relationship with the child<br>Mothers of ID increased in PF coping over time, leading to lower subjective burden and depression and better relationships at wave 2<br>Being a CG significantly associated with higher levels of BP and cortisol<br>Lower instrumental social support – higher levels of cortisol                                                                                                                                                                                                                                             |
| Kim & Knight (2006)                                     | 7 | Cross- sectional<br>Self-report<br>Between groups | n= 87 CG's, 87 matched NCG's<br>Mean age 63 years                                      | Sociocultural stress and coping model for caregivers (Aranda & knight 1997) | ✓ | ✓<br>Blood pressure<br>Salivary cortisol |                                                                                                                                                                                                                                                                                                                                                                                                                                                                                                                                                                                                                                                                                                                                                                                                                                                                                    |
| Mausbach, Chattillion, Roepke, Patterson & Grant (2013) | 6 | Cross- sectional<br>Self-report<br>Between groups | n= 125 CG's of spouses with Alzheimer's Disease (AD), 60 spouses not caring for AD     |                                                                             | ✓ |                                          | CG had greater depressive symptoms than controls, higher NA, fear, hostility and sadness<br>CG more likely to report less PA and joviality relative to controls<br>Lower access to several psychological resources relative to controls<br>CG reported greater activity restriction than NC<br>Caregivers utilised fewer positive coping and greater negative coping strategies relative to controls<br>Active and avoidant coping scores were similar between groups<br>Did not differ in terms of burden or depressive symptoms<br>Subjective reports of poor physical health higher in AA CG's                                                                                                                                                                                                                                                                                  |
| McCallum, Longmire & Knight (2007)                      | 5 | Cross- sectional<br>Self-report<br>Between groups | n= 35 African American (AA) CG's, 35 White American CG's<br>Mean age 60.73/65.42 years | Sociocultural stress and coping model (Aranda & knight 1997)                | ✓ |                                          |                                                                                                                                                                                                                                                                                                                                                                                                                                                                                                                                                                                                                                                                                                                                                                                                                                                                                    |
| Merritt & McCallum (2013)                               | 6 | Cross- sectional<br>Self-report<br>Between groups | n= 30 CG's, 30 NCG's<br>Mean age 58.2/59.6                                             |                                                                             | ✓ | ✓<br>Salivary cortisol                   | Higher positive RCOPE correlated with higher cortisol slopes<br>Increasing RCOPE scores were associated with flatter cortisol slope scores<br>Caregiver status associated with marginally flatter but non-significant cortisol slopes than non-caregivers<br>Higher RCOPE scores were correlated with flatter cortisol slopes for caregivers but not for non-caregivers<br>Positive RCOPE scores were associated with flatter cortisol slope scores<br>Higher negative RCOPE scores predicted marginally flatter negative cortisol slopes for non-caregivers but no changes for caregivers<br>Higher combined and positive (but not negative) RCOPE scores were associated with increasingly flatter or worse cortisol slope scores for caregivers (but not controls)<br>Caregivers who reported higher RMBPC scores, higher combined and positive (but not negative) RCOPE scores |

|                                      |   |                                                  |                                                                                                                |                                                                  |   |                        |                                                                                                                                                                                                                                                                                                                                                                                                                                                                                                                                                                                                                                                                                                                                                                                                                                                                                                                                                                                                                                                                                                                                                                                                                                                                                                                                                                                                                                                                                                                                                                                                                                                                                                                                                                                                                                                                                                                                                                                                                                                                                                                                                                                                                                                                                                                                                                                                                                                                                    |
|--------------------------------------|---|--------------------------------------------------|----------------------------------------------------------------------------------------------------------------|------------------------------------------------------------------|---|------------------------|------------------------------------------------------------------------------------------------------------------------------------------------------------------------------------------------------------------------------------------------------------------------------------------------------------------------------------------------------------------------------------------------------------------------------------------------------------------------------------------------------------------------------------------------------------------------------------------------------------------------------------------------------------------------------------------------------------------------------------------------------------------------------------------------------------------------------------------------------------------------------------------------------------------------------------------------------------------------------------------------------------------------------------------------------------------------------------------------------------------------------------------------------------------------------------------------------------------------------------------------------------------------------------------------------------------------------------------------------------------------------------------------------------------------------------------------------------------------------------------------------------------------------------------------------------------------------------------------------------------------------------------------------------------------------------------------------------------------------------------------------------------------------------------------------------------------------------------------------------------------------------------------------------------------------------------------------------------------------------------------------------------------------------------------------------------------------------------------------------------------------------------------------------------------------------------------------------------------------------------------------------------------------------------------------------------------------------------------------------------------------------------------------------------------------------------------------------------------------------|
| Pakenham & Bursnall (2006)           | 6 | Cross-sectional<br>Self-report<br>Between groups | n= 48 children of parents with MS, 146 children with health parent mean age 17.7 years                         | Transactional Model of Stress & Coping (Lazarus & Folkman, 1984) | ✓ |                        | <p>were unexpectedly associated with increasingly flatter cortisol slopes</p> <p>Parental illness and greater family responsibilities related to higher distress</p> <p>Lower levels of perceived choice in caregiving and parental functional impairment associated with lower adjustment on positive outcomes</p> <p>Higher stress appraisals related to higher distress and lower life satisfaction</p> <p>Higher levels of qualitative social support related to higher positive outcomes, less distress and better health, greater number of support people was related to greater life satisfaction</p> <p>More reliance on problem solving, acceptance and seeking social support and less reliance on wishful thinking and denial = greater positive outcomes</p> <p>Greater reliance on wishful thinking and denial related to greater distress</p> <p>MS caregivers reported higher family responsibilities and somatization, lower life satisfaction and positive affect and less reliance on problem solving coping and seeking social support coping</p> <p>None of the coping strategies were related to health status</p> <p>Caregivers used 'behaviour escape' more than controls</p> <p>Caregivers showed lower levels of social support in all dimensions</p> <p>Caregivers showed higher levels of trait anxiety, depressive symptoms and both internal and external anger expression</p> <p>Caregivers showed less ability to regulate negative emotions compared to the control group</p> <p>Caregivers indicated more symptoms on all physical health subscales indicating poorer health</p> <p>Higher magnitude of cortisol response in caregivers than the controls when controlling for negative effect</p> <p>Resilience negatively correlated with somatic symptoms, anxiety, insomnia and perceived general health</p> <p>Resilience negatively correlated with Casl for the four time points and AUC</p> <p>High scores in resilience related to high levels of emotional, tangible, positive social interaction and global index of support</p> <p>When controlling for CG variables – no significant associations between resilience, somatic symptoms and severe depression – relationship between resilience and perceived general health remained significant</p> <p>Total effect of resilience on perceived general health was significant, resilience in turn predicted social support – social support predicted perceived general health</p> |
| Ruiz-Robledillo & Moya-Albiol (2013) | 7 | Cross-sectional<br>Self-report<br>Between groups | n= 53 parents of child with Autism Spectrum Disorder (ASD), 54 parents of health children Mean age 45.32/42.80 |                                                                  | ✓ | ✓<br>Salivary cortisol |                                                                                                                                                                                                                                                                                                                                                                                                                                                                                                                                                                                                                                                                                                                                                                                                                                                                                                                                                                                                                                                                                                                                                                                                                                                                                                                                                                                                                                                                                                                                                                                                                                                                                                                                                                                                                                                                                                                                                                                                                                                                                                                                                                                                                                                                                                                                                                                                                                                                                    |
| Ruiz-Robledillo et al (2014)         | 7 | Cross-sectional<br>Self-report<br>Between groups | n= 67 parents of ASD Mean age 45.46 years                                                                      |                                                                  | ✓ | ✓<br>Salivary cortisol |                                                                                                                                                                                                                                                                                                                                                                                                                                                                                                                                                                                                                                                                                                                                                                                                                                                                                                                                                                                                                                                                                                                                                                                                                                                                                                                                                                                                                                                                                                                                                                                                                                                                                                                                                                                                                                                                                                                                                                                                                                                                                                                                                                                                                                                                                                                                                                                                                                                                                    |

|                                      |   |                                                  |                                                                                                       |                                                                     |   |                                                                                                                                                                                                                                                                                                                                                                                                                                                                                                                                                                                                                                                                                                                                                                                                                                                                                                                                                                                                |
|--------------------------------------|---|--------------------------------------------------|-------------------------------------------------------------------------------------------------------|---------------------------------------------------------------------|---|------------------------------------------------------------------------------------------------------------------------------------------------------------------------------------------------------------------------------------------------------------------------------------------------------------------------------------------------------------------------------------------------------------------------------------------------------------------------------------------------------------------------------------------------------------------------------------------------------------------------------------------------------------------------------------------------------------------------------------------------------------------------------------------------------------------------------------------------------------------------------------------------------------------------------------------------------------------------------------------------|
| Sander, High, Hannay & Sherer (1997) | 7 | Cross-sectional<br>Self-report<br>Between groups | n= 69 CG of close head injury (acute, intermediate and long term)<br>Mean age<br>39.1/45.8/45.1 years | Framework for studying family stress following TBI (Graffi & Mines) | ✓ | <p>Emotional/informational support had direct effect on perceived general health</p> <p>Positive social interaction showed direct effect on perceived general health</p> <p>CG's with higher resilience show better perceived health, lower morning cortisol levels and less are under the curve (AUC)</p> <p>As emotion-focused coping increased so did level of psychological distress</p> <p>Coping did not moderate relationship between burden and emotional distress</p> <p>Satisfaction with social support linked to psychological distress</p> <p>Greater use of emotion-focussed coping was related to greater emotional distress – coping style contributed to variance in BHQ scores</p> <p>Problem-focused coping not related to GHQ scores</p> <p>Coping accounted for more of the variance in BHQ scores than DRS scores</p> <p>Higher levels of subjective burden were related to greater number of symptoms on GHQ</p> <p>Amount of social support was not related to GHQ</p> |
|--------------------------------------|---|--------------------------------------------------|-------------------------------------------------------------------------------------------------------|---------------------------------------------------------------------|---|------------------------------------------------------------------------------------------------------------------------------------------------------------------------------------------------------------------------------------------------------------------------------------------------------------------------------------------------------------------------------------------------------------------------------------------------------------------------------------------------------------------------------------------------------------------------------------------------------------------------------------------------------------------------------------------------------------------------------------------------------------------------------------------------------------------------------------------------------------------------------------------------------------------------------------------------------------------------------------------------|

*Note.* ✓ = measures used

Table 2

## Main characteristics of qualitative studies

| Study                                           | Quality Score<br>(Max 20) | Method                                                                                | Participant characteristics                                    | Theory                                                                                            | Findings                                                                                                                                                                                                                                                                                                                                                                                                                                                                                                                                                                                                                                     |
|-------------------------------------------------|---------------------------|---------------------------------------------------------------------------------------|----------------------------------------------------------------|---------------------------------------------------------------------------------------------------|----------------------------------------------------------------------------------------------------------------------------------------------------------------------------------------------------------------------------------------------------------------------------------------------------------------------------------------------------------------------------------------------------------------------------------------------------------------------------------------------------------------------------------------------------------------------------------------------------------------------------------------------|
| Azman et al<br>(2015)                           | 17                        | Semi-structured<br>interviews<br>Content analysis                                     | N=15, CG's of mental ill family<br>members, age 25-86,         |                                                                                                   | Five coping strategies identified:<br>1. Religious coping<br>2. Emotional coping<br>3. Acceptance<br>4. Engage in leisure activities<br>5. Traditional healing                                                                                                                                                                                                                                                                                                                                                                                                                                                                               |
| Bailey,<br>Letiecq &<br>Porterfield<br>(2009)   | 19                        | Semi-structured<br>interviews<br>Thematic Analysis                                    | n= 26 grand families                                           | Double ABCX<br>Model of Family<br>Adjustment and<br>Adaptation<br>(McCubbin &<br>Patterson, 1983) | Communicating with schools<br>Reframing perceptions as positive                                                                                                                                                                                                                                                                                                                                                                                                                                                                                                                                                                              |
| Dickson et al<br>(2011)                         | 16                        | Semi-structured<br>interviews<br>Interpretive<br>Phenomenological<br>Analysis         | n= 11 spousal CG's of acquired<br>traumatic Spinal Cord Injury |                                                                                                   | Coping with the spousal caregiver role (emotion focussed strategies):<br>venting emotion, time out, role of support, focussing on the positive<br>aspects of SCI<br>Putting the pieces back together again:<br>reducing work hours, accepting financial hardship, using paid carers,<br>acceptance that life will never be the same, balance between<br>adaptability and stability, positive reappraisal<br>Need for patience<br>Support with physical care<br>Emotional support from family members & ministers<br>Spirituality – strong religious convictions, church services<br>Formal assistance – adult day care, home health services |
| Gerdner,<br>Tripp-Reimer<br>& Simpson<br>(2007) | 18                        | Longitudinal<br>Semi-structured<br>interviews<br>Observation<br>Ethnographic analysis | n= 15 African American CG's                                    |                                                                                                   |                                                                                                                                                                                                                                                                                                                                                                                                                                                                                                                                                                                                                                              |
| Kaplan<br>(2010)                                | 14                        | Semi-structured<br>interviews<br>Grounded Theory                                      | n= 20 CG mothers                                               |                                                                                                   | Consistent social support – friend or family member that helps with<br>care<br>Uncertain future affected coping and structural barriers like lack of<br>communication                                                                                                                                                                                                                                                                                                                                                                                                                                                                        |
| Kita & Ito<br>(2013)                            | 19                        | Semi-structured<br>interviews<br>Comparative Analysis/<br>Grounded Theory             | n= 18 family CG's of frail older<br>adults                     | Family Systems<br>Theory (Bowen,<br>1966)                                                         | Routinisation of daily life<br>Minimisation of competition of needs among family members<br>Incorporate risk management strategies into daily life<br>Integrate care methods and outside services into family culture<br>Reconfirming the meaning and importance of the care<br>Sharing care experiences<br>Devising care methods to reduce time and labour                                                                                                                                                                                                                                                                                  |
| Kitter &<br>Sharman<br>(2015)                   | 19                        | Semi-structured<br>interviews                                                         | n= 20 CG's of traumatic brain<br>injury                        | Self-determination<br>theory                                                                      | Social support was beneficial – good to talk<br>Enriching experiences through caregiving – appreciation of life<br>Keeping own identity<br>Taking time out/respice                                                                                                                                                                                                                                                                                                                                                                                                                                                                           |

|                                      |    |                                                                                           |                                                 |                                                                        |                                                                                                                                                                                                                                                                                                                                                                                                                                                                                                                                                                                                                                                                                                                                                                                                                                                                                                                                                                                                                                                                                                       |
|--------------------------------------|----|-------------------------------------------------------------------------------------------|-------------------------------------------------|------------------------------------------------------------------------|-------------------------------------------------------------------------------------------------------------------------------------------------------------------------------------------------------------------------------------------------------------------------------------------------------------------------------------------------------------------------------------------------------------------------------------------------------------------------------------------------------------------------------------------------------------------------------------------------------------------------------------------------------------------------------------------------------------------------------------------------------------------------------------------------------------------------------------------------------------------------------------------------------------------------------------------------------------------------------------------------------------------------------------------------------------------------------------------------------|
| Le Dorze, Tremblay & Croteau (2009)  | 19 | Semi-structured interviews                                                                | n= 1 adult daughter CG for aphasic father       | Adaptation theory (Michallet et al 2003)                               | Reaction to stress was proactive: obtained information, modified communication with father and oversaw his health and treatments<br>Used visual supports, proximity to father, communicating with others in a similar situation, self-care                                                                                                                                                                                                                                                                                                                                                                                                                                                                                                                                                                                                                                                                                                                                                                                                                                                            |
| McCausland & Cavanaugh (2001)        | 19 | Semi-structured interviews Comparative method                                             | n= 13 CG of spouses waiting for lung transplant |                                                                        | Social support, drawing on past experience of illnesses or deaths of parents<br>Action: calling social support, support groups, researching online, volunteering, and therapy.<br>Acceptance: recognition that undesirable situation could not be changed<br>Disengagement: separation from the transplant situation – e.g. guests, working<br>Planning: Child care, work arrangements, packing bags, telephone calls, living will.<br>Support: emotional, esteem, information sharing, tangible support                                                                                                                                                                                                                                                                                                                                                                                                                                                                                                                                                                                              |
| Sun (2014)                           | 20 | Semi-structured interviews<br>Thematic Analysis                                           | n= 18 family CG of dementia                     | Stress-coping frameworks (Knight et al 2000, Lazarus and Folkman 1984) | EFC – to cope with worries, frustration and other negative feelings associated with CG. Hobbies, self-validation, informal support, counselling. PFC – compare progress with books & media<br>Coping with physical limitations and emotional/behavioural problems of CR – physical exercise, indoor games, paid homemakers, engage in activities, lowering expectations, avoid confrontation, finding humour, technology<br>Coping with social restrictions – find alternative entertainment than leaving house, computer games, reading<br>Coping with financial burden – PFC seeking employment and assistance from government<br>PFC – for family conflict<br>Coping with pressure from social environment – withhold information<br>Seeking an explanation, finding meaning<br>Valuing the caregiver role, identifying benefits, recognition<br>Coordination of care with siblings – consistent communication and effort<br>Taking charge – initiative, decisiveness and readiness to take on the role, housing arrangements, leadership within family<br>Spirituality – religion, social support |
| Thornton & Hopp (2011)               | 18 | Semi-structured interviews<br>Interpretive Phenomenological Analysis                      | n= 7 adult daughter CG's                        |                                                                        | Looking on the bright side<br>Downward comparisons with others – considering themselves more fortunate, and coping resources as more efficient<br>Humour when feeling helpless<br>Acceptance- adopting innovative coping techniques<br>Normalising problems<br>Planning, organising and seeking information to increase sense of control<br>Some avoidant coping behaviours                                                                                                                                                                                                                                                                                                                                                                                                                                                                                                                                                                                                                                                                                                                           |
| Williams, Morrison & Robinson (2014) | 19 | Semi-structured interviews<br>Photo elicitation<br>Interpretive Phenomenological Analysis | n= 13 CG's of stroke or dementia                | Transactional Model of Stress & Coping (Lazarus & Folkman, 1984)       | Positive marital bond was a coping strategy, affection, physical touch, feeling cared for<br>Support from adult children                                                                                                                                                                                                                                                                                                                                                                                                                                                                                                                                                                                                                                                                                                                                                                                                                                                                                                                                                                              |
| Wong et al (2015)                    | 19 | Semi-structured interviews<br>Grounded Theory                                             | n= 10 CG families of dementia                   |                                                                        |                                                                                                                                                                                                                                                                                                                                                                                                                                                                                                                                                                                                                                                                                                                                                                                                                                                                                                                                                                                                                                                                                                       |

|                       |    |                                                                                     |                                                                 |                                                                                                                                                                                                                             |
|-----------------------|----|-------------------------------------------------------------------------------------|-----------------------------------------------------------------|-----------------------------------------------------------------------------------------------------------------------------------------------------------------------------------------------------------------------------|
| Zegwaard et al (2013) | 19 | Semi-structured interviews<br>Associative, inductive strategy and continuous coding | n= 19 CG who look after older adults with severe mental illness | Perceived freedom of choice – voluntary act of compassion vs unavoidable obligation, gain vs loss<br>Togetherness, accepting inequality, autonomy<br>Finding meaning, meaningful participation in social life<br>Acceptance |
|-----------------------|----|-------------------------------------------------------------------------------------|-----------------------------------------------------------------|-----------------------------------------------------------------------------------------------------------------------------------------------------------------------------------------------------------------------------|

---
